# Supplementary material for: Missed opportunities for delivering nutrition interventions in first 1000 days of life in India: insights from the National Family Health Survey, 2006 and 2016
Source: PubMed Central journal article supplement (PMC7908280; doi:10.1136/bmjgh-2020-003717), 2021-02-24
Supplement: bmjgh-2020-003717supp001.pdf [file bmjgh-2020-003717supp001.pdf]

**Supplemental Table 1: Inequality in coverages and opportunity gaps of nutrition interventions and their respective service delivery platforms in India, 2006 and 2016, by wealth quintile and age group**

| Period           | Age group                             | Indicators                               | 2006 |      |      |      |          |         | 2016 |      |      |      |          |          |
|------------------|---------------------------------------|------------------------------------------|------|------|------|------|----------|---------|------|------|------|------|----------|----------|
|                  |                                       |                                          | Q1   | Q2   | Q3   | Q4   | Q5       | SII     | Q1   | Q2   | Q3   | Q4   | Q5       | SII      |
| During pregnancy | 15-19y                                | Early ANC                                | 32.1 | 46.2 | 62.4 | 84.2 | 69.4     | 49.3*** | 44.1 | 59.4 | 64.0 | 68.9 | 75.0     | 33.5***  |
|                  |                                       | IFA 100+                                 | 7.6  | 12.8 | 19.2 | 32.4 | 24.7     | 20.1*** | 16.7 | 28.1 | 31.6 | 35.7 | 42.4     | 26.4***  |
|                  |                                       | <b>Gaps early ANC: IFA 100+</b>          | 24.2 | 33.6 | 43.2 | 51.3 | 43.5     | 28.8*** | 27.3 | 31.3 | 32.4 | 33.7 | 32.9     | 20.7***  |
|                  | 20-24y                                | Early ANC                                | 39.0 | 59.3 | 71.1 | 80.1 | 83.2     | 58.6*** | 47.3 | 61.1 | 68.5 | 71.2 | 78.2     | 34.2***  |
|                  |                                       | IFA 100+                                 | 9.4  | 18.7 | 27.5 | 33.8 | 47.1     | 40.5*** | 18.3 | 29.9 | 33.9 | 39.1 | 45.3     | 29.8***  |
|                  |                                       | <b>Gaps early ANC: IFA 100+</b>          | 29.5 | 40.1 | 43.0 | 45.8 | 35.5     | 20.0*** | 28.9 | 31.1 | 34.5 | 31.8 | 32.8     | 7.9***   |
|                  | 25-49y                                | Early ANC                                | 49.6 | 66.6 | 77.4 | 85.0 | 92.0     | 52.4*** | 48.8 | 62.9 | 69.7 | 75.7 | 80.9     | 33.6***  |
|                  |                                       | IFA 100+                                 | 15.4 | 30.6 | 40.1 | 48.0 | 50.1     | 43.8*** | 21.7 | 36.6 | 42.1 | 47.5 | 53.5     | 33.3***  |
|                  |                                       | <b>Gaps early ANC: IFA 100+</b>          | 33.9 | 35.2 | 37.1 | 36.8 | 41.8     | 4.8     | 26.9 | 26.2 | 27.5 | 27.9 | 27.3     | -2.9     |
|                  | 15-19y                                | ANC4+                                    | 20.8 | 42.3 | 48.5 | 77.3 | 65.3     | 53.0*** | 37.5 | 60.9 | 63.5 | 66.1 | 67.1     | 37.3***  |
|                  |                                       | Deworming                                | 3.2  | 3.8  | 6.5  | 9.0  | 1.9      | 4.1     | 13.6 | 18.5 | 17.7 | 18.9 | 26.0     | 8.8**    |
|                  |                                       | <b>Gaps ANC 4+: Deworming</b>            | 17.6 | 38.3 | 42.1 | 67.8 | 63.5     | 53.7*** | 23.8 | 42.3 | 45.7 | 47.7 | 40.7     | 27.4***  |
|                  | 20-24y                                | ANC4+                                    | 28.3 | 53.4 | 68.5 | 79.2 | 85.2     | 70.3*** | 34.0 | 54.1 | 64.6 | 68.5 | 72.5     | 44.1***  |
|                  |                                       | Deworming                                | 2.5  | 3.7  | 5.7  | 5.6  | 8.6      | 6.5***  | 13.1 | 19.4 | 20.7 | 21.1 | 21.3     | 9.3***   |
|                  |                                       | <b>Gaps ANC 4+: Deworming</b>            | 25.7 | 49.4 | 62.4 | 73.4 | 76.4     | 64.3*** | 20.8 | 34.7 | 43.8 | 47.5 | 51.1     | 33.3***  |
|                  | 25-49y                                | ANC4+                                    | 41.6 | 65.0 | 78.4 | 89.1 | 88.9     | 58.5*** | 38.5 | 58.9 | 67.4 | 74.3 | 78.6     | 39.4***  |
|                  |                                       | Deworming                                | 3.5  | 6.4  | 8.1  | 6.8  | 5.2      | 1.7     | 15.6 | 24.0 | 23.9 | 24.9 | 23.0     | 4.4**    |
|                  |                                       | <b>Gaps ANC 4+: Deworming</b>            | 36.9 | 58.3 | 70.1 | 81.9 | 83.6     | 55.1*** | 22.9 | 34.9 | 43.5 | 49.5 | 55.5     | 30.7***  |
|                  | 15-19y                                | THR                                      | 20.8 | 24.4 | 15.9 | 14.8 | 1.1      | -5.1    | 56.0 | 65.8 | 61.1 | 56.1 | 38.9     | -4.4     |
|                  |                                       | Nutrition counseling                     | 8.3  | 12.9 | 6.5  | 11.0 | 0.0      | 2.3     | 38.3 | 50.6 | 46.4 | 45.3 | 31.6     | 4.6      |
|                  |                                       | <b>Gaps THR: Nutrition counseling</b>    | 12.5 | 11.5 | 9.5  | 3.8  | 1.1      | -9.1*   | 17.7 | 15.2 | 14.6 | 10.9 | 7.3      | -10.2*** |
| 20-24y           | THR                                   | 25.8                                     | 24.2 | 17.2 | 9.9  | 5.8  | -24.1*** | 57.2    | 63.5 | 60.8 | 53.1 | 41.4 | -17.2*** |          |
|                  | Nutrition counseling                  | 14.6                                     | 12.4 | 10.3 | 5.9  | 2.8  | -13.8*** | 39.6    | 48.6 | 48.9 | 42.7 | 33.1 | -6.1***  |          |
|                  | <b>Gaps THR: Nutrition counseling</b> | 11.2                                     | 11.8 | 6.9  | 4.1  | 3.0  | -13.3*** | 17.7    | 15.0 | 11.9 | 10.5 | 8.3  | -10.7*** |          |
| 25-49y           | THR                                   | 24.6                                     | 21.3 | 13.5 | 6.7  | 3.1  | -30.1*** | 58.4    | 63.2 | 53.7 | 41.5 | 31.2 | -40.7*** |          |
|                  | Nutrition counseling                  | 13.9                                     | 14.3 | 7.7  | 4.1  | 1.8  | -18.7*** | 40.4    | 48.9 | 43.0 | 34.0 | 24.9 | -27.9*** |          |
|                  | <b>Gaps THR: Nutrition counseling</b> | 10.6                                     | 7.0  | 5.8  | 2.6  | 1.3  | -14.5*** | 18.0    | 14.3 | 10.7 | 7.5  | 6.3  | -14.6*** |          |
| During delivery  | 15-19y                                | Institutional delivery                   | 29.6 | 50.3 | 72.4 | 86.9 | 87.7     | 63.0*** | 78.5 | 86.5 | 89.7 | 95.2 | 98.6     | 22.5***  |
|                  |                                       | EIBF                                     | 16.2 | 27.7 | 23.1 | 30.8 | 34.2     | 20.0*** | 42.2 | 45.4 | 42.6 | 41.9 | 44.9     | 0.5      |
|                  |                                       | <b>Gaps Institutional delivery: EIBF</b> | 12.2 | 25.4 | 47.7 | 54.0 | 52.8     | 36.2*** | 36.6 | 42.1 | 47.5 | 52.5 | 53.8     | 8.1*     |
|                  | 20-24y                                | Institutional delivery                   | 37.7 | 61.0 | 75.6 | 85.6 | 91.6     | 68.0*** | 77.8 | 88.0 | 92.4 | 95.1 | 97.0     | 22.7***  |
|                  |                                       | EIBF                                     | 24.6 | 27.8 | 31.4 | 28.0 | 25.7     | 5.4     | 39.8 | 43.0 | 44.6 | 43.3 | 41.7     | 2.8      |

|                  |        |                                          |      |      |      |      |      |          |      |      |      |      |      |          |
|------------------|--------|------------------------------------------|------|------|------|------|------|----------|------|------|------|------|------|----------|
|                  |        | <b>Gaps Institutional delivery: EIBF</b> | 13.8 | 33.9 | 43.7 | 58.0 | 67.4 | 39.0***  | 39.3 | 45.9 | 48.6 | 52.3 | 55.9 | 4.6*     |
|                  | 25-49y | Institutional delivery                   | 51.1 | 73.6 | 83.4 | 92.7 | 96.5 | 57.6***  | 78.4 | 90.6 | 94.9 | 97.3 | 98.9 | 21.8***  |
|                  |        | EIBF                                     | 27.2 | 29.5 | 33.4 | 37.1 | 30.6 | 6.6      | 39.1 | 47.0 | 44.2 | 42.6 | 42.8 | -0.2     |
|                  |        | <b>Gaps Institutional delivery: EIBF</b> | 26.9 | 44.7 | 51.6 | 54.9 | 66.6 | 29.5***  | 41.7 | 44.0 | 52.0 | 55.0 | 56.5 | 5.9*     |
| During lactation | 15-19y | THR                                      | 15.6 | 15.8 | 11.2 | 6.8  | 3.9  | -7.7     | 50.8 | 55.5 | 53.6 | 45.7 | 32.5 | -8.2*    |
|                  |        | Nutrition counseling                     | 5.7  | 8.3  | 7.3  | 4.2  | 2.5  | 2.2      | 33.2 | 41.1 | 38.5 | 36.9 | 25.1 | 1.1      |
|                  |        | <b>Gaps THR: Nutrition counseling</b>    | 9.9  | 7.4  | 3.9  | 2.5  | 1.3  | -8.9*    | 17.5 | 14.3 | 15.1 | 8.9  | 7.4  | -7.9**   |
|                  | 20-24y | THR                                      | 20.3 | 17.3 | 12.3 | 7.3  | 3.9  | -20.6*** | 52.5 | 57.4 | 55.0 | 47.8 | 37.2 | -16.5*** |
|                  |        | Nutrition counseling                     | 10.4 | 8.3  | 6.2  | 4.4  | 2.6  | -10.1*** | 34.4 | 42.9 | 43.3 | 38.7 | 29.9 | -3.7*    |
|                  |        | <b>Gaps THR: Nutrition counseling</b>    | 9.9  | 9.0  | 6.1  | 2.9  | 1.3  | -12.2*** | 18.1 | 14.4 | 11.7 | 9.2  | 7.3  | -12.4*** |
|                  | 25-49y | THR                                      | 22.6 | 17.6 | 11.5 | 3.0  | 2.5  | -30.3*** | 54.0 | 58.6 | 48.2 | 39.1 | 27.9 | -38.5*** |
|                  |        | Nutrition counseling                     | 11.6 | 10.8 | 4.9  | 2.6  | 0.9  | -16.8*** | 36.8 | 44.9 | 38.0 | 32.4 | 22.4 | -25.5*** |
|                  |        | <b>Gaps THR: Nutrition counseling</b>    | 11.0 | 6.7  | 6.6  | 0.5  | 1.6  | -14.4*** | 17.2 | 13.8 | 10.2 | 6.7  | 5.5  | -12.7*** |
| During childhood | 15-19y | Weight measurement                       | 13.2 | 16.5 | 16.1 | 12.8 | 6.4  | 3.4      | 43.4 | 52.8 | 46.9 | 43.7 | 39.6 | -1.0     |
|                  |        | Weight counseling                        | 6.7  | 6.6  | 9.0  | 9.4  | 6.4  | 2.3      | 25.7 | 34.6 | 27.0 | 30.2 | 23.7 | 0.9      |
|                  |        | <b>Gaps Weight: Weight counseling</b>    | 6.5  | 9.9  | 7.1  | 3.4  | 0.0  | 1.2      | 17.7 | 18.3 | 19.9 | 13.5 | 15.9 | -1.9     |
|                  | 20-24y | Weight measurement                       | 21.2 | 20.2 | 16.4 | 7.8  | 6.4  | -18.3*** | 45.5 | 54.1 | 52.6 | 47.8 | 39.7 | -6.4***  |
|                  |        | Weight counseling                        | 12.0 | 10.4 | 7.9  | 4.1  | 2.6  | -12.1*** | 28.3 | 35.8 | 35.9 | 31.2 | 26.1 | -2.6     |
|                  |        | <b>Gaps Weight: Weight counseling</b>    | 9.2  | 9.8  | 8.5  | 3.8  | 3.8  | -6.5***  | 17.2 | 18.3 | 16.7 | 16.6 | 13.7 | -3.8***  |
|                  | 25-49y | Weight measurement                       | 19.2 | 24.6 | 13.8 | 6.0  | 4.3  | -24.8*** | 48.2 | 53.3 | 48.3 | 41.2 | 29.7 | -29.6*** |
|                  |        | Weight counseling                        | 11.0 | 11.9 | 7.8  | 3.2  | 2.3  | -13.9*** | 28.4 | 35.5 | 32.7 | 27.7 | 18.9 | -18.8*** |
|                  |        | <b>Gaps Weight: Weight counseling</b>    | 8.2  | 12.7 | 6.0  | 2.8  | 2.0  | -11.4*** | 19.8 | 17.8 | 15.6 | 13.5 | 10.8 | -11.0*** |
|                  | 15-19y | ORS                                      | 13.8 | 23.4 | 27.0 | 25.6 | 58.7 | 25.8*    | 37.4 | 48.4 | 37.5 | 36.9 | 60.1 | 6.9      |
|                  |        | Zinc                                     | 0.0  | 0.0  | 0.0  | 0.0  | 0.0  | 0        | 18.4 | 16.8 | 12.8 | 23.9 | 38.0 | 7.2      |
|                  |        | <b>Gaps ORS: Zinc</b>                    | 13.8 | 23.4 | 26.9 | 25.6 | 58.7 | 25.8*    | 18.3 | 31.0 | 25.1 | 12.6 | 22.1 | -2.5     |
|                  | 20-24y | ORS                                      | 23.5 | 22.7 | 32.7 | 36.3 | 62.8 | 31.6***  | 43.4 | 49.1 | 57.6 | 55.0 | 61.3 | 20.8***  |
|                  |        | Zinc                                     | 0.2  | 0.6  | 0.0  | 0.0  | 0.0  | -0.2     | 17.5 | 19.3 | 21.7 | 20.1 | 22.4 | 5.3      |
|                  |        | <b>Gaps ORS: Zinc</b>                    | 23.3 | 22.1 | 32.2 | 36.3 | 62.8 | 31.1***  | 25.1 | 29.9 | 35.6 | 35.0 | 38.2 | 10.3**   |
|                  | 25-49y | ORS                                      | 24.7 | 42.2 | 43.5 | 64.5 | 57.7 | 48.7***  | 49.5 | 54.4 | 56.5 | 59.0 | 65.8 | 19.1***  |
|                  |        | Zinc                                     | 0.0  | 0.0  | 0.0  | 7.2  | 0.0  | 5.3      | 21.0 | 20.9 | 22.0 | 26.6 | 30.6 | 13.7**   |
|                  |        | <b>Gaps ORS: Zinc</b>                    | 24.7 | 42.2 | 45.2 | 57.3 | 57.7 | 46.2**   | 26.3 | 33.1 | 33.0 | 32.3 | 35.0 | 3.2      |

ANC: antenatal care; IFA: iron folic acid; EIBF: Early initiation of breastfeeding; ORS: Oral Rehydration Salts Solutions; THR: Take home ration

**Supplemental Table 2: Inequality in coverages and opportunity gaps of nutrition interventions and their respective service delivery platforms in India, 2006 and 2016, by education**

| Period                                | Indicators                               | 2006         |                   |                     |                |                | 2016         |                   |                     |                |                |
|---------------------------------------|------------------------------------------|--------------|-------------------|---------------------|----------------|----------------|--------------|-------------------|---------------------|----------------|----------------|
|                                       |                                          | No education | Primary schooling | Secondary schooling | ≥ High school  | SII            | No education | Primary schooling | Secondary schooling | ≥ High school  | SII            |
| During pregnancy                      | Early ANC                                | 25.5         | 42.4              | 63.3                | 88.4           | 66.7***        | 41.2         | 53.8              | 65.7                | 76.4           | 43.7***        |
|                                       | IFA 100+                                 | 5.9          | 13.3              | 24.8                | 49.7           | 41.9***        | 15.8         | 23.9              | 36.2                | 51.0           | 42.7***        |
|                                       | <b>Gaps early ANC: IFA 100+</b>          | 19.3         | 29.0              | 37.9                | 38.7           | <b>36.6***</b> | 25.4         | 30.0              | 29.4                | 25.2           | <b>11.5***</b> |
|                                       | ANC4+                                    | 16.0         | 35.5              | 59.2                | 85.3           | 73.2***        | 27.9         | 45.3              | 60.9                | 72.8           | 56.0***        |
|                                       | Deworming                                | 2.4          | 3.5               | 5.4                 | 6.5            | 5.5***         | 12.1         | 15.7              | 21.1                | 23.7           | 16.2***        |
|                                       | <b>Gaps ANC 4+: Deworming</b>            | 13.5         | 31.9              | 53.5                | 78.7           | <b>68.0***</b> | 15.7         | 29.5              | 39.7                | 49.0           | <b>40.7***</b> |
|                                       | THR                                      | 17.8         | 23.5              | 19.9                | 6.9            | -1.1           | 50.2         | 59.0              | 56.7                | 34.8           | -8.3           |
|                                       | Nutrition counseling                     | 8.1          | 13.6              | 12.1                | 4.7            | 4.1***         | 33.0         | 43.7              | 44.7                | 27.8           | 3.8***         |
| <b>Gaps THR: Nutrition counseling</b> | 9.7                                      | 9.9          | 7.9               | 2.2                 | -5.5***        | 17.3           | 15.3         | 12.0              | 7.0                 | -12.8***       |                |
| During delivery                       | Institutional delivery                   | 19.5         | 39.0              | 64.9                | 93.1           | 75.8***        | 63.7         | 75.6              | 89.3                | 97.0           | 44.3***        |
|                                       | EIBF                                     | 16.1         | 24.1              | 32.5                | 35.2           | 28.5***        | 38.4         | 42.4              | 46.9                | 42.2           | 9.4***         |
|                                       | <b>Gaps Institutional delivery: EIBF</b> | 2.8          | 15.2              | 31.3                | 56.4           | <b>44.9***</b> | 27.5         | 34.8              | 43.0                | 54.9           | <b>4.2***</b>  |
| During lactation                      | THR                                      | 14.2         | 18.6              | 15.2                | 5.2            | -1.9           | 45.4         | 53.5              | 51.8                | 31.3           | -7.1***        |
|                                       | Nutrition counseling                     | 6.0          | 9.5               | 8.6                 | 3.4            | 2.6**          | 29.1         | 38.4              | 40.3                | 24.7           | 4.3***         |
|                                       | <b>Gaps THR: Nutrition counseling</b>    | 8.2          | 9.1               | 6.6                 | 1.9            | -4.7***        | 16.3         | 15.1              | 11.5                | 6.6            | -11.1***       |
| During childhood                      | Weight measurement                       | 13.7         | 21.5              | 18.0                | 5.2            | 2.5*           | 39.0         | 49.9              | 49.5                | 32.1           | 0.9            |
|                                       | Weight counseling                        | 6.4          | 10.8              | 9.5                 | 3.3            | 3.1***         | 23.1         | 31.8              | 32.7                | 20.9           | 4.4***         |
|                                       | <b>Gaps Weight: Weight counseling</b>    | 7.3          | 10.6              | 8.4                 | 1.9            | -0.6           | 15.9         | 18.0              | 16.7                | 11.2           | -3.5***        |
|                                       | ORS                                      | 18.6         | 24.5              | 34.4                | 53.1           | 32.4***        | 43.4         | 47.8              | 53.8                | 60.6           | 20.7***        |
|                                       | Zinc                                     | 0.1          | 0.5               | 0.3                 | 1.6            | 1.0            | 17.3         | 20.6              | 21.9                | 26.3           | 9.8***         |
| <b>Gaps ORS: Zinc</b>                 | 18.6                                     | 24.0         | 34.0              | 51.4                | <b>31.9***</b> | 25.7           | 27.1         | 31.3              | 34.0                | <b>13.0***</b> |                |

ANC: antenatal care; IFA: iron folic acid; EIBF: Early initiation of breastfeeding; ORS: Oral Rehydration Salts Solutions; THR: Take home ration

**Supplemental Table 3: Inequality in coverages and c opportunity gaps of nutrition interventions and their respective service delivery platforms in India, 2006 and 2016, by wealth quintile and residential area**

| Period           | Residence                             | Indicators                               | 2006 |      |      |      |                | 2016           |      |      |      |      |                 |                |
|------------------|---------------------------------------|------------------------------------------|------|------|------|------|----------------|----------------|------|------|------|------|-----------------|----------------|
|                  |                                       |                                          | Q1   | Q2   | Q3   | Q4   | Q5             | SII            | Q1   | Q2   | Q3   | Q4   | Q5              | SII            |
| During pregnancy | Rural                                 | Early ANC                                | 24.8 | 40.2 | 51.9 | 66.9 | 74.7           | 52.2***        | 35.7 | 50.5 | 58.9 | 67.4 | 74.3            | 44.7***        |
|                  |                                       | IFA 100+                                 | 6.8  | 11.8 | 18.0 | 29.9 | 40.9           | 27.5***        | 13.2 | 21.5 | 29.6 | 35.9 | 43.9            | 35.4***        |
|                  |                                       | <b>Gaps early ANC: IFA 100+</b>          | 17.9 | 28.1 | 33.6 | 36.4 | 33.6           | <b>31.6***</b> | 22.4 | 29.0 | 29.3 | 31.4 | 30.4            | <b>18.1***</b> |
|                  | Urban                                 | Early ANC                                | 33.6 | 47.5 | 55.3 | 70.5 | 83.6           | 54.7***        | 39.9 | 52.5 | 59.9 | 69.6 | 76.8            | 30.8***        |
|                  |                                       | IFA 100+                                 | 8.1  | 13.0 | 18.2 | 27.2 | 41.6           | 41.4***        | 18.5 | 25.8 | 33.7 | 40.2 | 49.3            | 30.2***        |
|                  |                                       | <b>Gaps early ANC: IFA 100+</b>          | 25.3 | 34.2 | 36.5 | 43.0 | 41.5           | <b>16.3***</b> | 21.4 | 26.9 | 26.3 | 29.4 | 27.4            | <b>1.4</b>     |
|                  | Rural                                 | ANC4+                                    | 14.7 | 30.7 | 45.0 | 59.3 | 73.2           | 56.0***        | 20.7 | 39.5 | 53.0 | 62.2 | 67.5            | 55.6***        |
|                  |                                       | Deworming                                | 2.7  | 4.2  | 4.2  | 5.9  | 5.5            | 3.7***         | 11.4 | 15.8 | 18.9 | 20.2 | 21.5            | 12.6***        |
|                  |                                       | <b>Gaps ANC 4+: Deworming</b>            | 11.9 | 26.4 | 40.4 | 53.1 | 67.3           | <b>51.8***</b> | 9.3  | 23.7 | 34.1 | 42.0 | 46.0            | <b>40.8***</b> |
|                  | Urban                                 | ANC4+                                    | 30.5 | 42.4 | 55.3 | 70.0 | 83.6           | 58.7***        | 31.6 | 47.1 | 57.7 | 67.1 | 74.1            | 32.6***        |
|                  |                                       | Deworming                                | 1.7  | 3.7  | 3.8  | 5.1  | 5.7            | 4.2***         | 13.6 | 18.4 | 21.0 | 22.0 | 22.8            | 5.1**          |
|                  |                                       | <b>Gaps ANC 4+: Deworming</b>            | 28.9 | 38.7 | 51.3 | 64.7 | 77.6           | <b>53.6***</b> | 17.8 | 28.6 | 36.8 | 45.0 | 51.3            | <b>26.0***</b> |
|                  | Rural                                 | THR                                      | 22.1 | 24.2 | 22.2 | 17.6 | 12.0           | -3.8*          | 52.3 | 61.5 | 65.7 | 61.5 | 53.4            | 6.7***         |
|                  |                                       | Nutrition counseling                     | 10.6 | 14.2 | 12.8 | 10.2 | 6.4            | 1.6            | 32.4 | 44.6 | 50.4 | 48.6 | 41.2            | 16.2***        |
|                  |                                       | <b>Gaps THR: Nutrition counseling</b>    | 11.5 | 10.0 | 9.5  | 7.4  | 5.7            | <b>-5.3***</b> | 19.9 | 16.9 | 15.3 | 12.9 | 12.2            | <b>-9.0***</b> |
| Urban            | THR                                   | 17.5                                     | 17.4 | 11.5 | 8.3  | 2.4  | -20.2***       | 48.9           | 49.9 | 48.0 | 40.3 | 27.4 | -32.0***        |                |
|                  | Nutrition counseling                  | 11.4                                     | 9.7  | 7.0  | 4.6  | 1.3  | -12.8***       | 34.2           | 38.6 | 39.8 | 33.2 | 22.9 | -23.9***        |                |
|                  | <b>Gaps THR: Nutrition counseling</b> | 6.1                                      | 7.7  | 4.5  | 3.7  | 1.1  | <b>-9.5***</b> | 14.8           | 11.4 | 8.2  | 7.1  | 4.5  | <b>-10.0***</b> |                |
| During delivery  | Rural                                 | Institutional delivery                   | 17.4 | 32.9 | 49.0 | 64.3 | 82.6           | 58.8***        | 60.8 | 74.3 | 82.2 | 89.1 | 94.7            | 40.9***        |
|                  |                                       | EIBF                                     | 16.7 | 24.9 | 30.0 | 30.9 | 34.1           | 22.2***        | 39.0 | 42.7 | 44.9 | 45.2 | 44.6            | 7.9***         |
|                  |                                       | <b>Gaps Institutional delivery: EIBF</b> | 0.7  | 7.8  | 19.5 | 36.0 | 48.5           | 36.3***        | 24.8 | 34.0 | 39.5 | 45.5 | 50.8            | 6.0***         |
|                  | Urban                                 | Institutional delivery                   | 35.5 | 49.5 | 64.9 | 79.5 | 90.5           | 59.6***        | 64.3 | 75.8 | 84.0 | 91.5 | 96.1            | 24.9***        |
|                  |                                       | EIBF                                     | 23.6 | 26.9 | 28.4 | 31.5 | 30.5           | 7.5*           | 43.7 | 47.6 | 44.8 | 47.3 | 42.9            | -4.9*          |
|                  |                                       | <b>Gaps Institutional delivery: EIBF</b> | 12.6 | 23.9 | 38.3 | 48.3 | 60.4           | 38.1***        | 24.5 | 30.3 | 41.2 | 44.6 | 53.8            | 10.2***        |
| During lactation | Rural                                 | THR                                      | 18.1 | 18.5 | 17.1 | 12.6 | 8.1            | -5.8***        | 47.5 | 56.4 | 59.0 | 56.2 | 48.0            | 5.5***         |
|                  |                                       | Nutrition counseling                     | 8.0  | 10.0 | 9.2  | 7.1  | 4.8            | 0.5            | 28.3 | 39.8 | 44.5 | 43.9 | 36.7            | 15.3***        |
|                  |                                       | <b>Gaps THR: Nutrition counseling</b>    | 10.1 | 8.4  | 7.9  | 5.5  | 3.3            | <b>-6.2***</b> | 19.2 | 16.6 | 14.5 | 12.3 | 11.2            | <b>-9.2***</b> |
|                  | Urban                                 | THR                                      | 13.8 | 14.0 | 8.5  | 5.8  | 1.7            | -16.6***       | 48.1 | 46.5 | 44.4 | 36.9 | 24.3            | -31.8***       |
|                  |                                       | Nutrition counseling                     | 8.2  | 6.1  | 4.9  | 3.0  | 0.8            | -8.9***        | 32.3 | 35.7 | 36.2 | 30.3 | 20.6            | -22.7***       |
|                  |                                       | <b>Gaps THR: Nutrition counseling</b>    | 5.6  | 7.8  | 3.6  | 2.8  | 0.9            | <b>-8.5***</b> | 15.8 | 10.8 | 8.2  | 6.6  | 3.7             | <b>-8.9***</b> |
| During childhood | Rural                                 | Weight measurement                       | 17.9 | 20.8 | 20.1 | 16.7 | 11.4           | 2.9            | 39.2 | 50.2 | 55.1 | 54.0 | 48.4            | 15.3***        |
|                  |                                       | Weight counseling                        | 8.8  | 10.4 | 9.9  | 8.1  | 6.5            | 0.4            | 22.5 | 31.8 | 36.2 | 35.9 | 30.7            | 13.8***        |

|  |              |                                       |      |      |      |      |      |          |      |      |      |      |      |          |
|--|--------------|---------------------------------------|------|------|------|------|------|----------|------|------|------|------|------|----------|
|  |              | <b>Gaps Weight: Weight counseling</b> | 9.1  | 10.4 | 10.1 | 8.6  | 4.8  | -0.2     | 16.7 | 18.3 | 18.9 | 18.1 | 17.6 | 1.4*     |
|  | <b>Urban</b> | Weight measurement                    | 10.7 | 12.7 | 11.4 | 6.7  | 3.0  | -12.7*** | 41.3 | 41.9 | 44.1 | 37.8 | 26.3 | -25.6*** |
|  |              | Weight counseling                     | 6.5  | 7.4  | 6.0  | 3.4  | 1.2  | -8.5***  | 24.7 | 27.4 | 29.7 | 25.2 | 17.5 | -16.7*** |
|  |              | <b>Gaps Weight: Weight counseling</b> | 4.2  | 5.3  | 5.4  | 3.3  | 1.9  | -4.4***  | 16.6 | 14.6 | 14.4 | 12.6 | 8.9  | -9.0***  |
|  | <b>Rural</b> | ORS                                   | 18.6 | 22.0 | 33.9 | 44.8 | 45.1 | 28.3***  | 41.7 | 47.1 | 48.8 | 53.4 | 56.4 | 16.7***  |
|  |              | Zinc                                  | 0.1  | 0.2  | 0.0  | 1.0  | 1.0  | 0.7      | 17.7 | 18.4 | 21.0 | 21.3 | 22.5 | 6.0***   |
|  |              | <b>Gaps ORS: Zinc</b>                 | 18.5 | 21.7 | 33.9 | 43.7 | 43.9 | 27.4***  | 23.6 | 28.0 | 27.1 | 31.7 | 33.9 | 12.3***  |
|  | <b>Urban</b> | ORS                                   | 22.2 | 26.0 | 28.7 | 34.8 | 46.4 | 28.9***  | 54.0 | 49.5 | 50.7 | 60.5 | 62.2 | 16.0***  |
|  |              | Zinc                                  | 1.6  | 0.7  | 0.7  | 0.1  | 0.3  | -1.5     | 12.9 | 22.8 | 22.0 | 23.6 | 27.0 | 9.5*     |
|  |              | <b>Gaps ORS: Zinc</b>                 | 20.5 | 25.4 | 28.1 | 34.7 | 46.2 | 28.3***  | 41.5 | 25.5 | 28.8 | 36.3 | 35.0 | 4.0      |

ANC: antenatal care; IFA: iron folic acid; EIBF: Early initiation of breastfeeding; ORS: Oral Rehydration Salts Solutions; THR: Take home ration

Supplemental Figure 1: Opportunity gaps during pregnancy in different states in India in 2016

a) Early ANC: IFA 100+

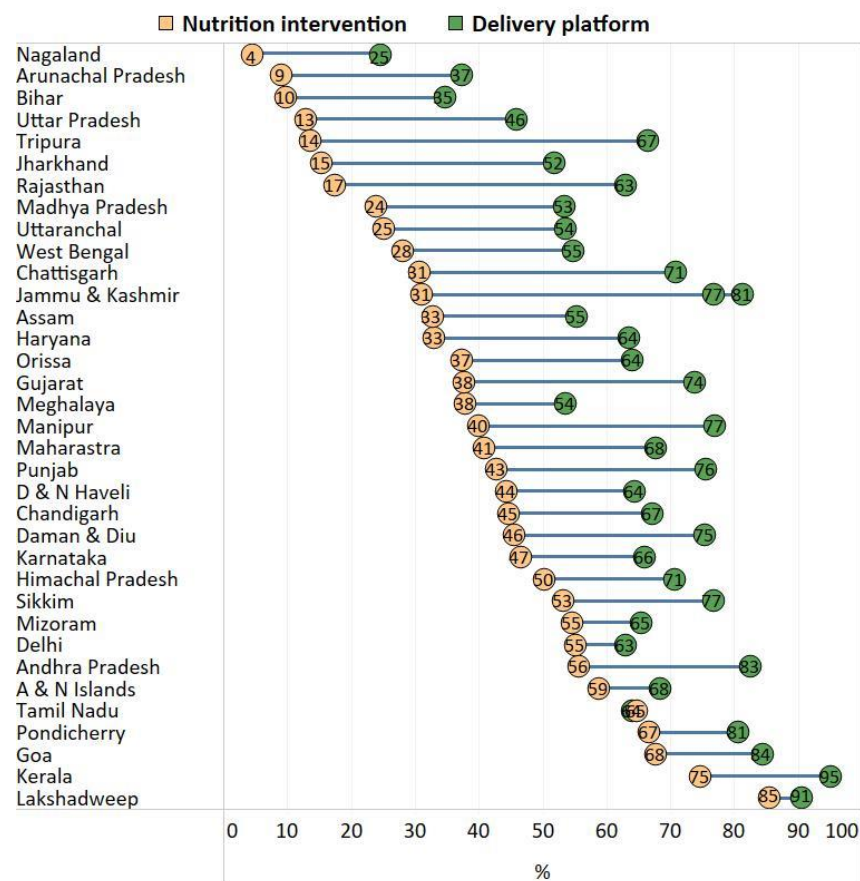

ANC: antenatal care; IFA: iron folic acid.

b) ANC 4+: Deworming

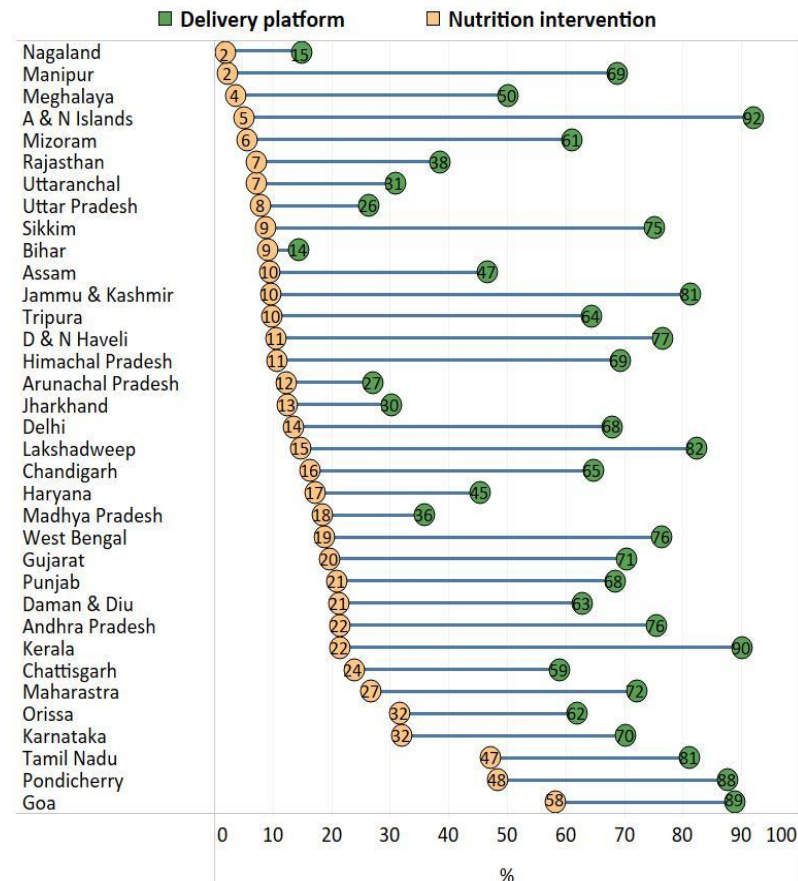

Supplemental Figure 2: Opportunity gaps during delivery and lactation in different states in India in 2016

a) Institutional delivery: EIBF

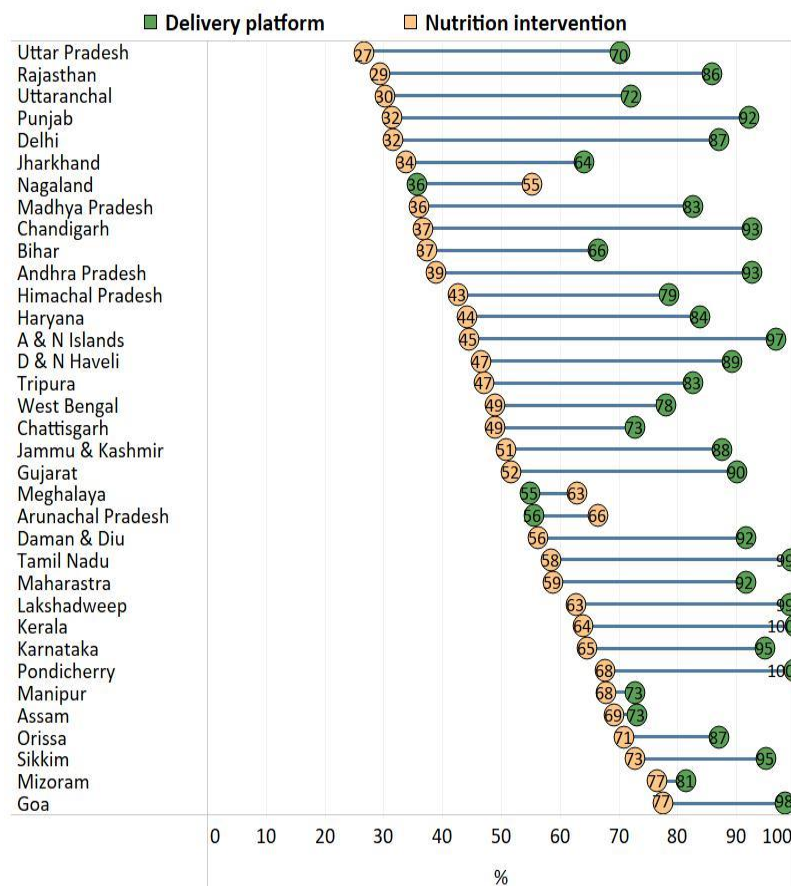

EIBF: Early initiation of breastfeeding

b) Food supplementation during lactation: Nutrition counseling

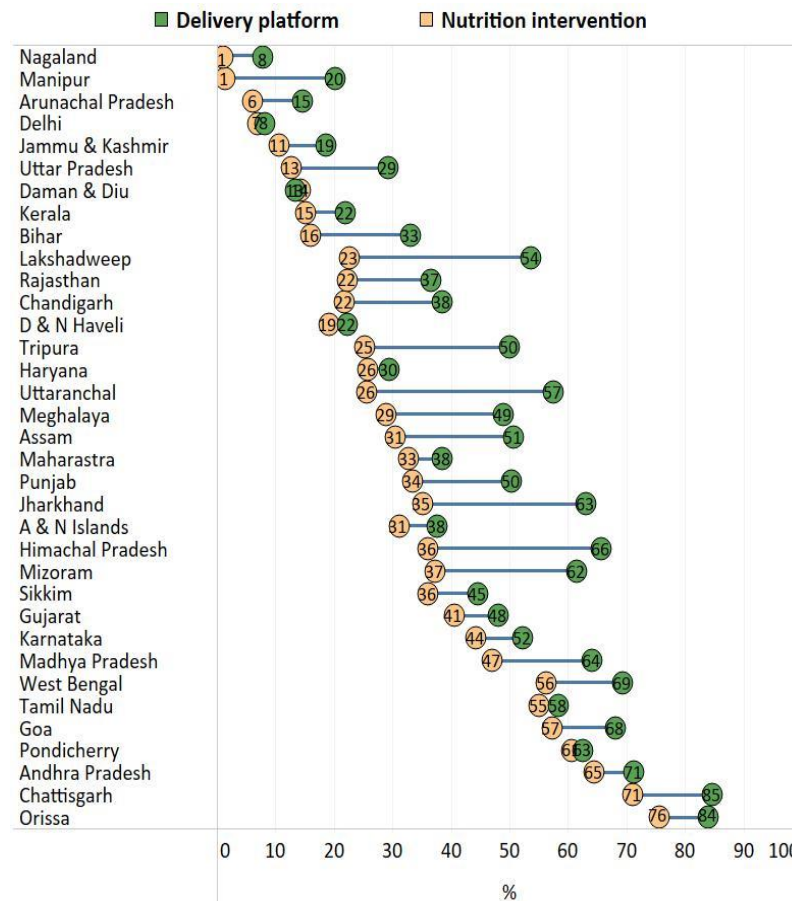



Supplemental Figure 3: Opportunity gaps during childhood in different states in India in 2016

a) Child weight: Weight counseling

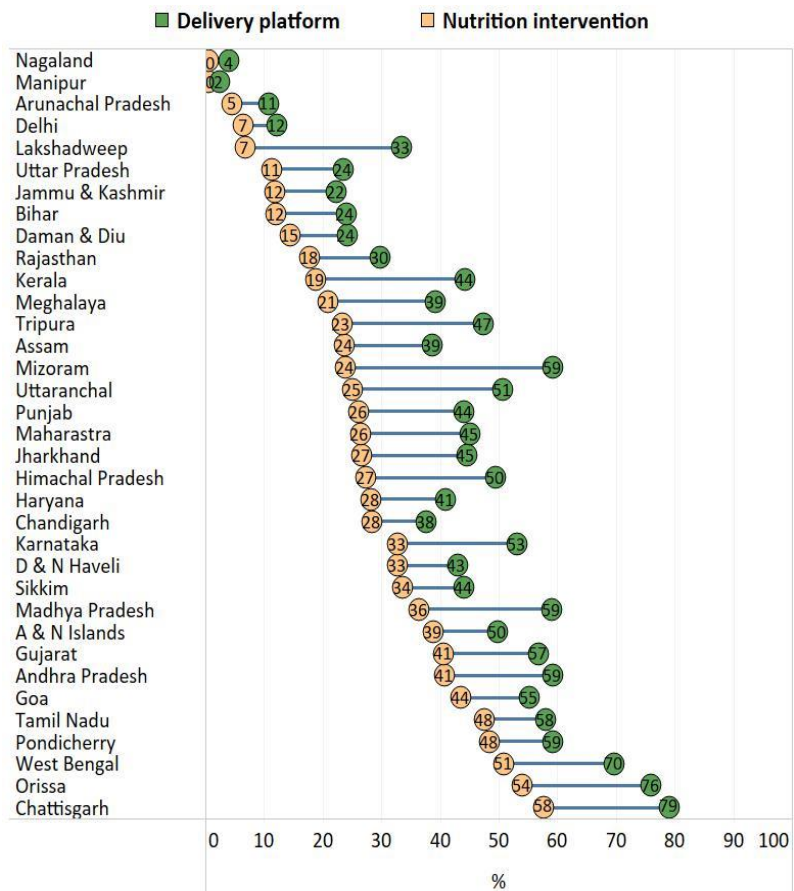

b) ORS: Zinc

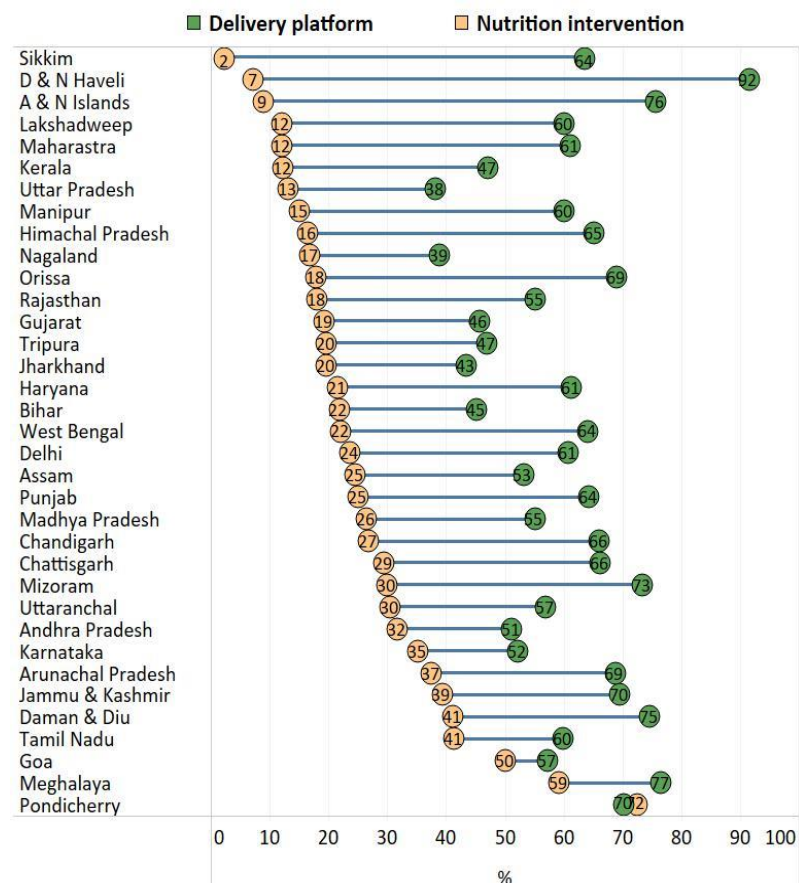

ORS: Oral Rehydration Salts Solutions.
